# Supplementary material for: Variation in female reproductive tract morphology across the reproductive cycle in the zebra finch
Source: PeerJ. 2020 Nov 11;8:e10195. doi: 10.7717/peerj.10195 (PMC7666545; doi:10.7717/peerj.10195)
Supplement: Supplemental Information 1 [file peerj-08-10195-s001.xlsx]

## Sheet: Sheet2
Title of manuscript :	Variation in female reproductive tract morphology and estradiol across the reproductive cycle in the zebra finch
Authors	Laura L Hurley
	Ondi L Crino
	Melissah Rowe
	Simon Griffith
Description	This file contains all the data to run the Analyses that are described in the associated R code file "R-code ZB Female Repro Tract.pdf". There is one data table as an individual CSV files using the same file name as the tab name so that the supplementary code can be easily followed for importing the data to R and replicate the analyses.
Suggested citation:	Hurley LL, Crino OL, Rowe M, and Griffith SC. 2018. Variation in female reproductive tract morphology and estradiol across the reproductive cycle in the zebra finch. XXXXX
Contact:	Laura.Hurley@mq.edu.au

## Sheet: Column Descriptors
Column Name:
Row	Unique row ID for organizational purposese
Date	Date bird euthanised
JulianDay	Eutahnised date converted to Julian date
TimePt	Sampling time point, coded with number and name to help with figure construction
Chicks	Number chicks produced (if produced)
Female	Band ID for female in pair
E2_NA	Estradiol values in pg/ml, with non-detectables as NA
E2_w_minimal	Estradiol values in pg/ml, with non-detectables as lowest curve value
E2_successful_YN	If E2 was detected from sample
Yolky	Number of yolky follicles
Mass_female	Female mass at time of euthanisia (g)
Tarsus_female	Length of female tarsus (mm)
Follicle_length	Diameter of Follicle a (mm) = widest part of follicle
Follicle_width1	Diameter of Follicle b (mm) = perpendicular to length on narrowest part
Follicle_width2	Diameter of Follicle c (mm) = perpendicular to width 1 on narrowest part
Follicle_Vol	Calculated volume of follicle - V =4/3πabc where a,b,c is 1/2 the value (radius) of three follicle measures
OvaductWT	Wet mass of Ovaduct cut away at the cloaca
SMI_F	Calculated Scale Mass Index (see R-Code)
Notes	Any notes on collection or processing of samples

## Sheet: FemaleReproTrack.csv
Row	Date	JulianDay	TimePt	Chicks	Female	E2_NA	E2_w_minimal	E2_successful_YN	Yolky	Mass_female	Tarsus_female	Follicle_length	Follicle_width1	Follicle_width2	Follicle_Vol	OvaductWT	SMI_F	Notes
1	2015-04-01	J2015091	3_D3	NA	Y910	45.93	45.93	Y	2	14.4	15.42	6.68	5.95	6.09	126.739	0.4336	0.0968548	egg in ova duct, but measured largest follicle
2	2015-05-22	J2015142	3_D3	NA	Y906	59.5737	59.5737	Y	4	15	14.9	6.25	6	6.47	127.038	0.581	0.109732
3	2015-03-22	J2015081	1_pre	NA	Y930	80.52	80.52	Y	5	15.1	14.19	6.31	6.2	6.37	130.485	0.331	0.124492	egg in ovaduct dissected out before weight
4	2015-04-22	J2015112	6_fledge	3	Y836	NA	0.8	N	3	14	14.41	3.4	3.47	3.61	22.3005	0.1489	0.111156	chicks fostered
5	2015-04-06	J2015096	1_pre	NA	Y926	NA	NA	NA	6	15.6	14.23	6.45	6.02	5.93	120.562	0.418	0.127731	egg in upper ovaduct dissected out before weight, **E2 sample dehydrated and not run
6	2015-05-05	J2015125	5_6DPH	NA	Y951	NA	0.8	N	0	14	14.13	1.31	1.31	0.95	0.85362	0.0309	0.116627	chicks fostered
7	2015-05-16	J2015136	1_pre	NA	Y807	NA	0.8	N	4	14.4	15.2	1.9	1.89	1.83	3.44085	0.1423	0.100324
8	2015-03-22	J2015081	1_pre	NA	Y800	46.44	46.44	Y	5	12.5	15.05	3.4	3.21	3.26	18.6295	NA	0.0892275
9	2015-04-18	J2015108	5_6DPH	3	Y892	NA	0.8	N	0	14.2	15.48	1.92	2.05	1.89	3.89507	NA	0.0946056	chicks fostered
10	2015-04-19	J2015109	5_6DPH	5	Y810	NA	0.8	N	0	13.5	15.17	1.88	1.83	1.6	2.88222	0.0192	0.0945097	chicks fostered
11	2015-04-02	J2015092	4_mid	NA	Y838	NA	0.8	N	0	14	13.92	2.01	1.78	1.87	3.50313	0.048	0.120983
12	2015-03-29	J2015088	3_D3	NA	Y848	NA	0.8	N	2	13	15.21	6.31	5.98	6.22	122.891	0.4633	0.0904243	laid egg today but still has egg in ovaduct and 1 ready to go
13	2015-04-06	J2015096	4_mid	NA	Y849	NA	0.8	N	0	14.5	14.16	1.62	1.97	1.83	3.05795	0.0402	0.120167
14	2015-03-27	J2015086	3_D3	NA	Y884	NA	0.8	N	1	12.8	14.05	1.41	1.48	1.4	1.5297	0.4265	0.108124	egg in ovaduct dissected out before weight
15	2015-05-18	J2015138	6_fledge	5	Y953	NA	0.8	N	0	13.4	14.53	1.26	1.39	1.13	1.03624	0.0213	0.104253	chicks fostered
16	2015-05-17	J2015137	6_fledge	3	Y866	NA	0.8	N	0	16	15.45	1.14	1.34	1.2	0.959819	0.0309	0.107105	chicks fostered
17	2015-05-03	J2015123	6_fledge	4	Y830	NA	0.8	N	0	14.2	15.06	1.33	1.41	1.18	1.15865	0.0285	0.101198	chicks fostered
18	2015-05-12	J2015132	4_mid		Y952	NA	0.8	N	0	17.5	15.84	1.69	1.59	1.45	2.0401	0.1113	0.110209
19	2015-04-16	J2015106	3_D3	NA	Y978	34.128	34.128	Y	1	12	13.97	1.65	1.44	1.45	1.8039	0.3778	0.102793	egg in ovaduct dissected out before weight
20	2015-04-16	J2015106	2_nest	NA	Y945	NA	0.8	N	5	12.2	12.53	3.3	3.06	2.77	14.6458	0.1372	0.136408
21	2015-04-09	J2015099	4_mid	NA	Y976	NA	0.8	N	0	12.6	14.36	1.67	1.37	1.46	1.74899	0.065	0.100895
22	2015-04-06	J2015096	2_nest	NA	Y937	44.72	44.72	Y	5	14	14.82	3.3	3.05	3.12	16.4425	0.2305	0.103776
23	2015-04-30	J2015120	6_fledge	5	Y984	NA	0.8	N	0	12.7	14.59	1.58	1.6	1.5	1.98549	0.0276	0.097815	chicks fostered
24	2015-04-17	J2015107	4_mid	NA	Y938	54.04	54.04	Y	0	15.4	14.62	1.88	1.84	1.59	2.87986	0.0702	0.118015
25	2015-03-19	J2015078	1_pre	NA	Y924	38.9818	38.9818	Y	4	13.6	14.24	2.93	3.04	2.85	13.2918	0.1625	0.111164
26	2015-04-20	J2015110	1_pre	NA	Y947	NA	0.8	N	3	16.5	15.52	2.63	2.37	2.69	8.7792	0.1359	0.109237
27	2015-03-29	J2015088	3_D3	NA	Y935	NA	0.8	N	2	16.1	15.02	2.32	2.43	2.41	7.11394	0.3267	0.115488	nothing in ova duct, 3 eggs in nest
28	2015-04-14	J2015104	2_nest	NA	Y975	152	152	Y	5	12.5	14.04	3.54	3.2	3.21	19.0396	0.1747	0.105774
29	2015-05-03	J2015123	6_fledge	5	Y1001	NA	0.8	N	1	12.1	15.08	1.1	1.3	0.96	0.718796	0.025	0.085952	chicks fostered
30	2015-05-15	J2015135	5_6DPH	4	Y1002	NA	0.8	N	0	14.3	14.68	1.53	1.58	1.38	1.74673	0.0514	0.108492	chicks fostered
31	2015-04-09	J2015099	4_mid	NA	Y1000	91.92	91.92	Y	0	12.1	14.2	1.39	1.49	1.51	1.63748	0.0541	0.0995869
32	2015-05-09	J2015129	5_6DPH	2	Y983	NA	0.8	N	0	12.9	14.34	1.7	1.79	1.72	2.7405	0.0493	0.103651	chicks undersized as parents not feeding well, fostered
33	2015-04-14	J2015104	5_6DPH	4	Y927	64.72	64.72	Y	0	13.2	14.88	1.69	1.71	1.7	2.57235	0.0243	0.0968822	chicks fostered
34	2015-04-09	J2015099	2_nest	NA	Y980	NA	0.8	N	4	14.4	15.16	7.54	6.98	7.13	196.478	0.2475	0.100973
35	2015-05-18	J2015138	2_nest	NA	Y921	134.266	134.266	Y	6	14.9	14.44	5.32	5.24	4.7	68.6024	0.3869	0.117701
36	2015-04-09	J2015099	2_nest	NA	Y925	106.15	106.15	Y	5	14.6	14.96	6.62	6.53	5.92	133.996	0.5748	0.10576
